# Supplementary material for: Accurate and sensitive low-density lipoprotein (LDL) detection based on the proximity ligation assisted rolling circle amplification (RCA)
Source: Royal Society of Chemistry journal article supplement (doi:10.1039/d4ay00070f), 2024-01-01
Supplement: d4ay00070f1.pdf [file d4ay00070f1.pdf]

## Supporting information

**Table S1.** DNA sequence in this work

| <b>Title</b> | <b>Sequences (5' to 3')</b>                |
|--------------|--------------------------------------------|
| s1           | CAT AAG ACT <b>GGT CAT GTG</b> TTT T       |
| s2           | TTT <b>TCA CAT GAC</b> CTC TAA TTG A       |
| linker       | TAG AAG TC                                 |
| padlock      | TTA TGT AAC TCA ACA CTT TAT TTT ATC TCA AT |
| H probe      | TCA ACA CTT TAT TTT TTT TAT AAA GTG T      |
